# Supplementary figures and images for: Single Stranded DNA Viruses Associated with Capybara Faeces Sampled in Brazil
Source: MDPI journal article supplement (doi:10.3390/v11080710), 2019-08-02

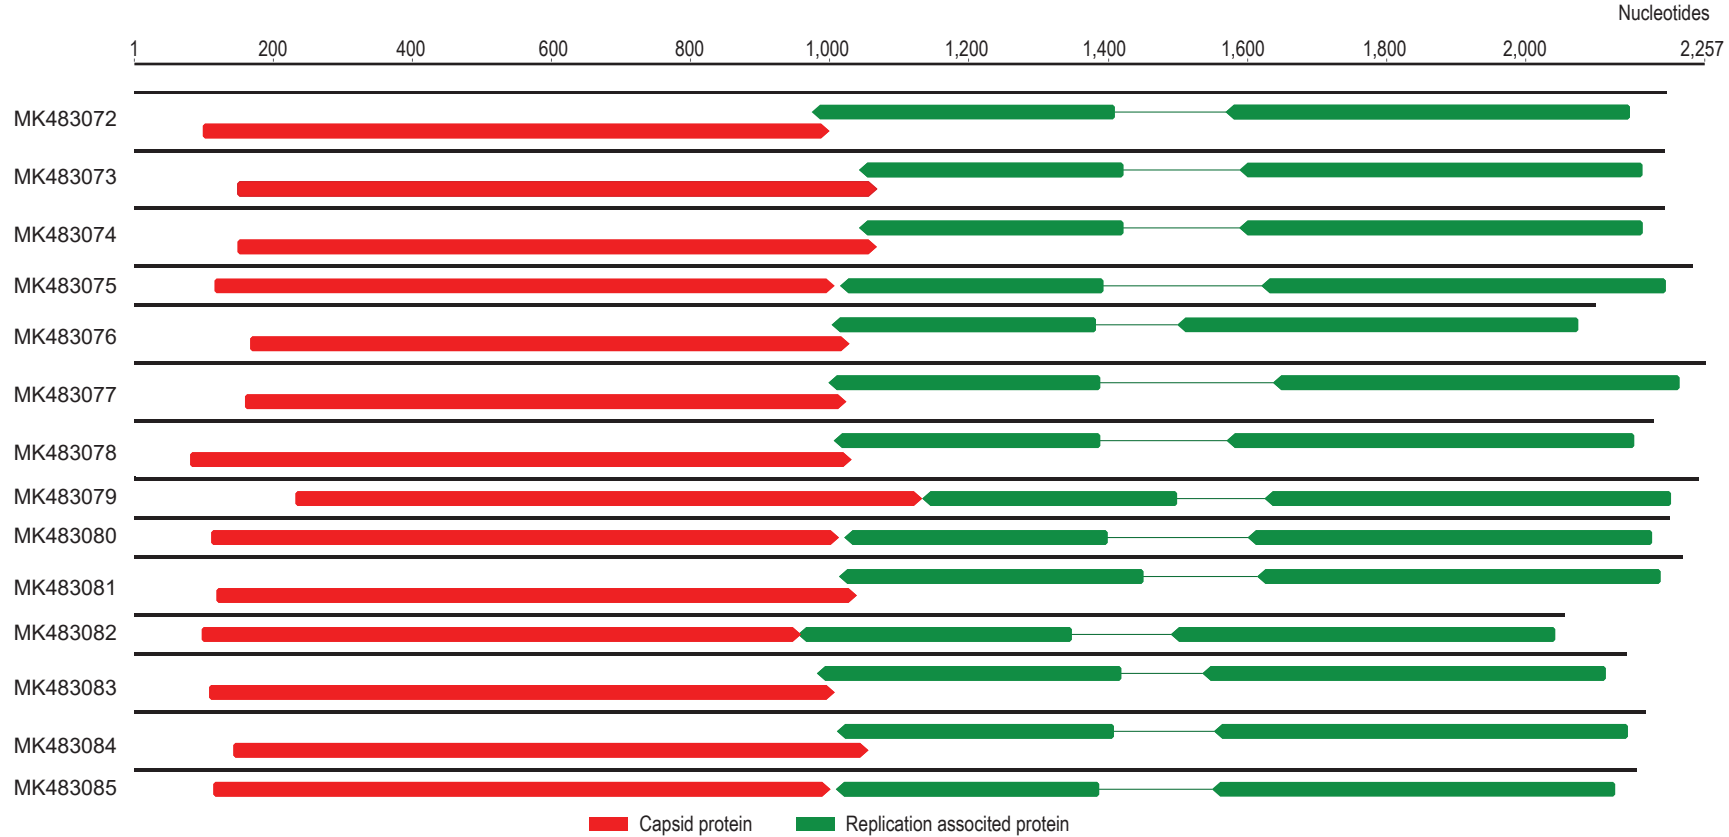

Supplement: s1 [file s1]

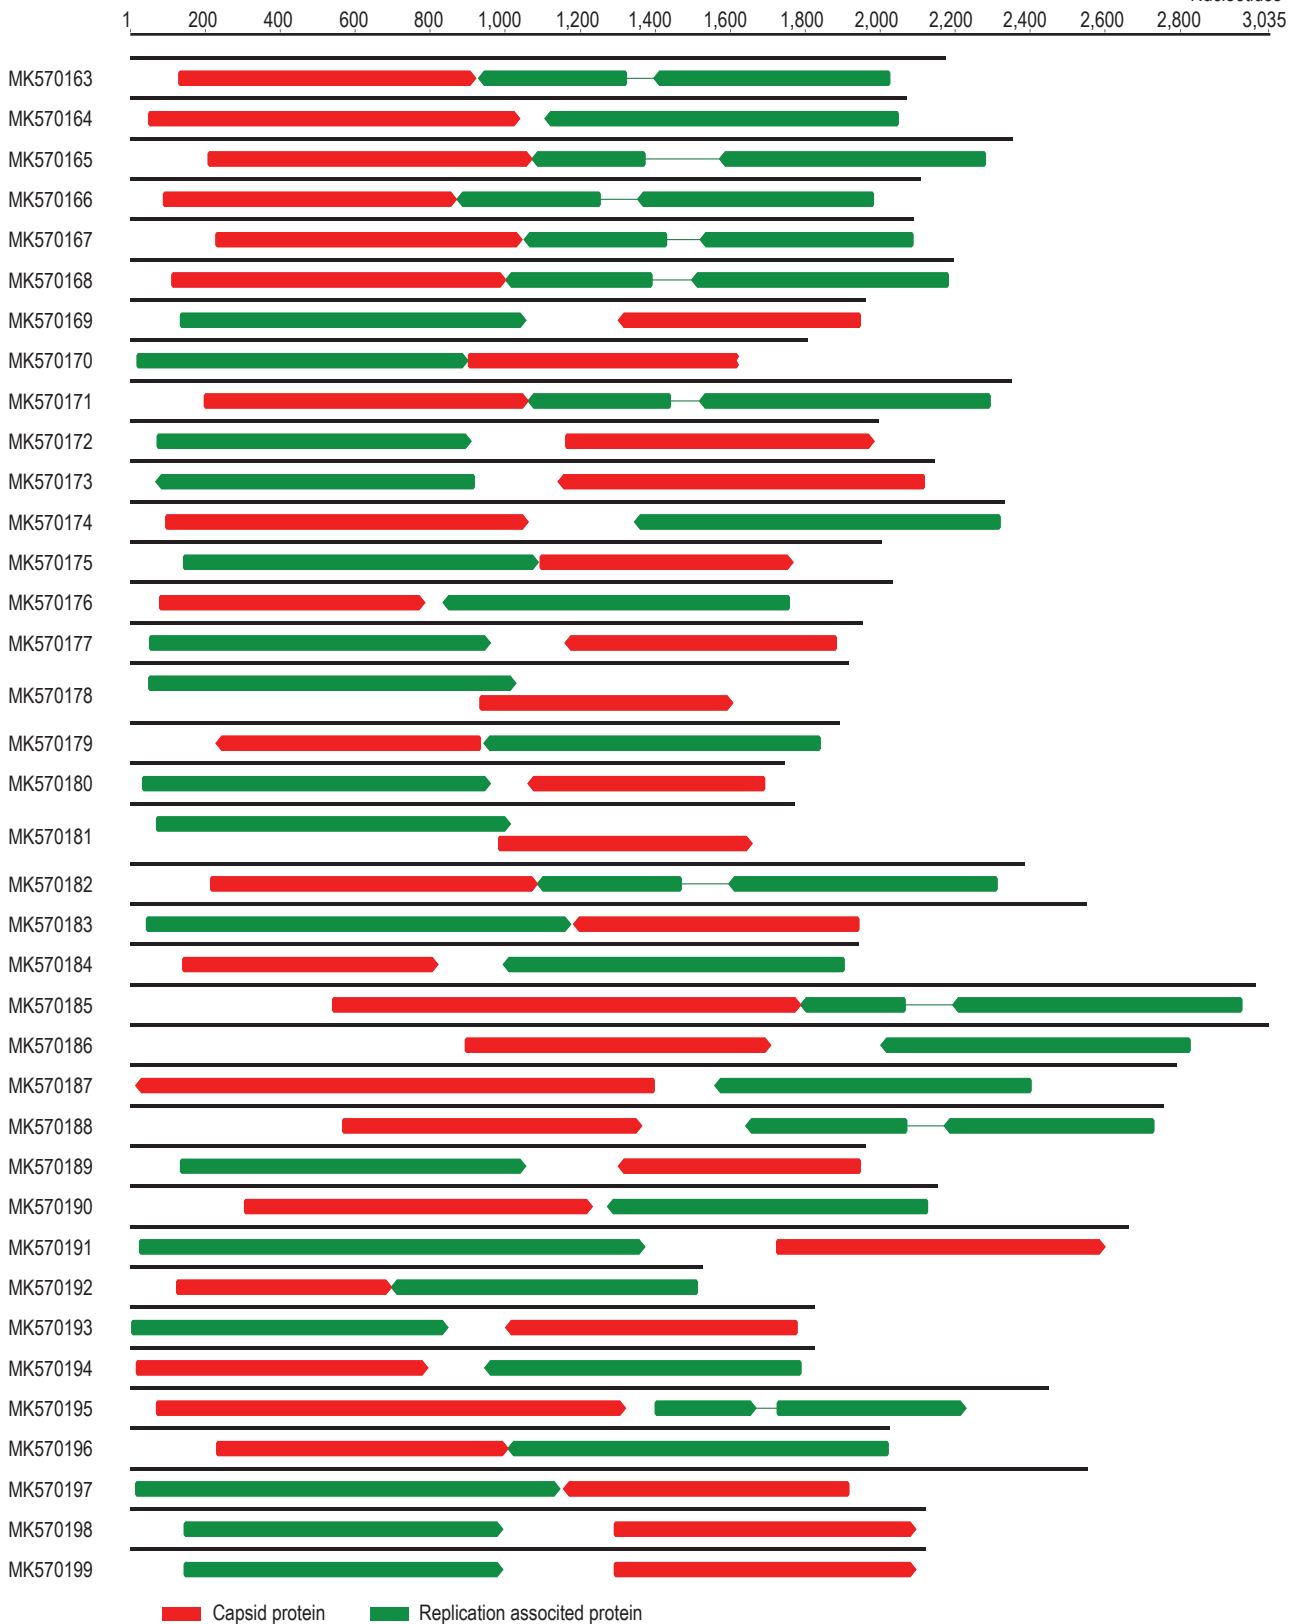

Supplement: s1 [file s1]

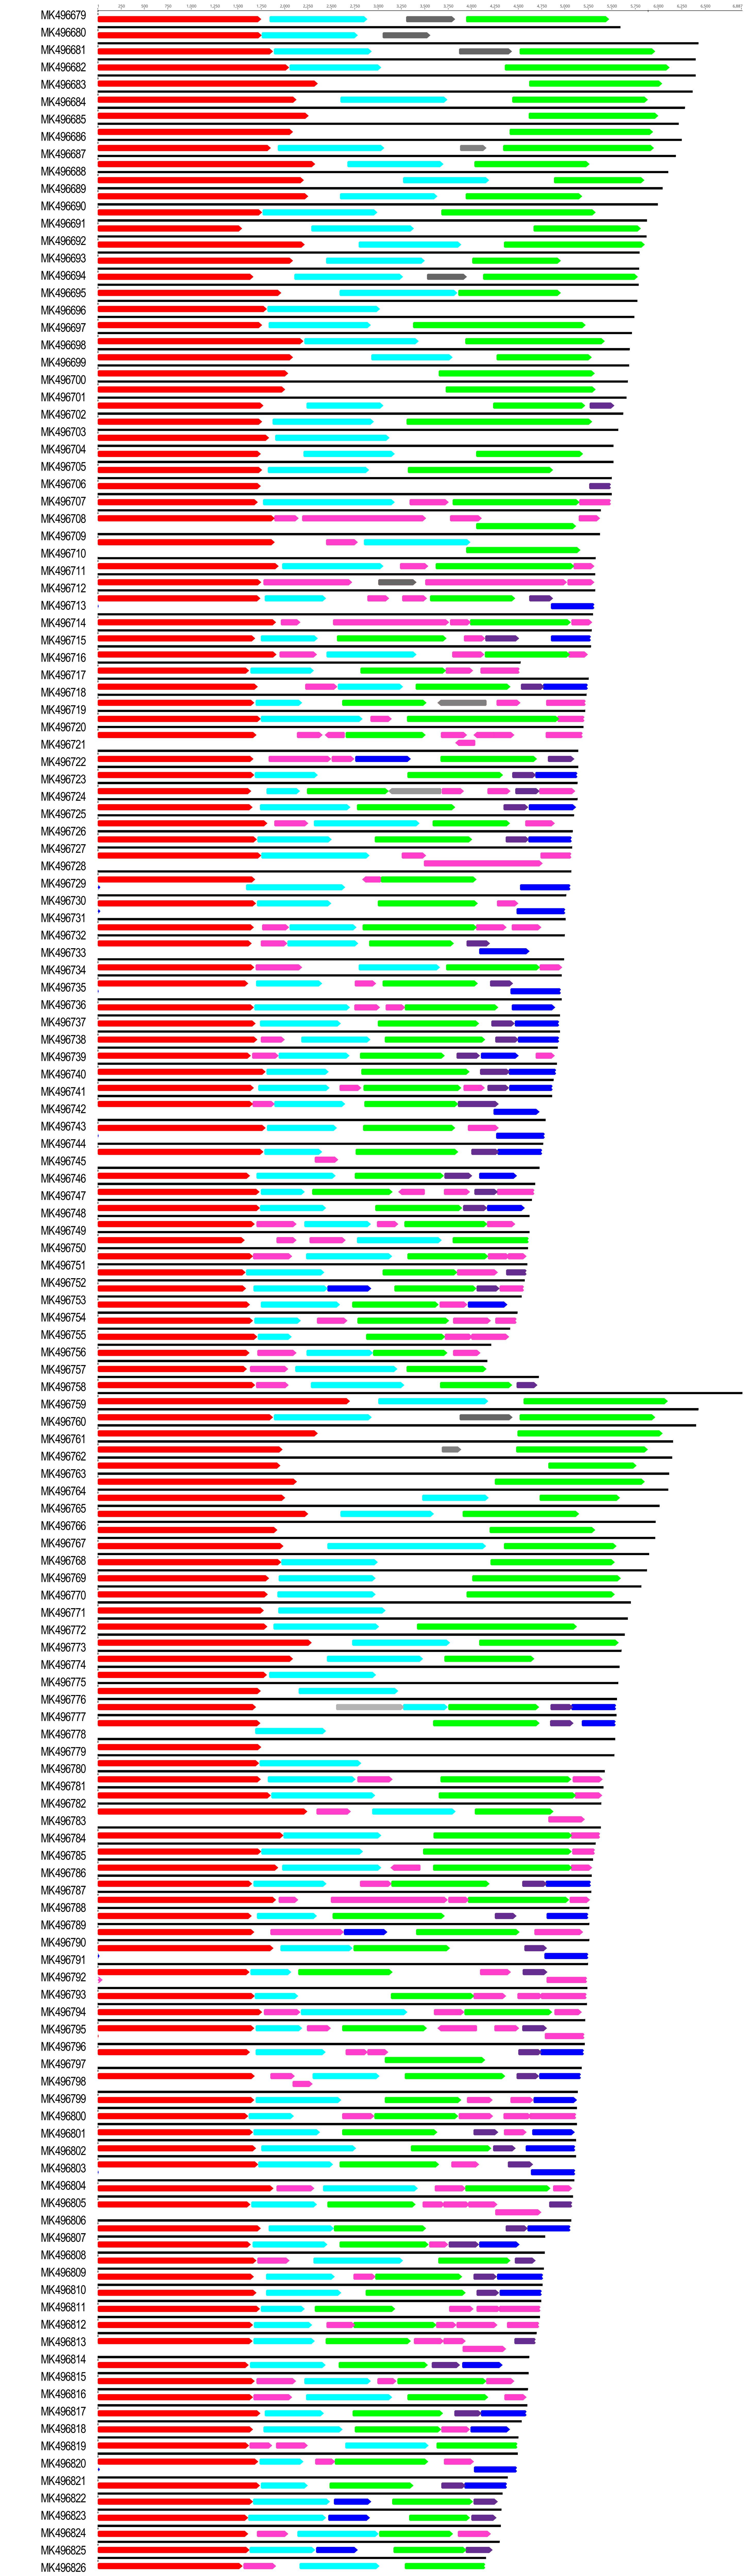

Supplement: s1 [file s1]
